# Supplementary material
Source: Springer Nature journal article supplement (https://www.springermedizin.de/resource/supplementary/13000_2013_780_MOESM4_ESM.pdf/9625486)

1 2 3 4 5 6 7 8 9 10

500bp  
400bp  
300bp  
200bp  
100bp

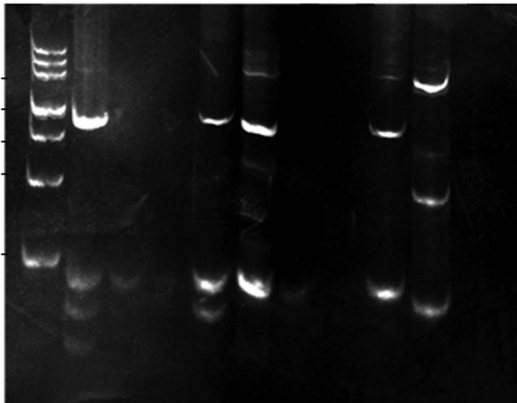

Supplement: MOESM4 [file 9625486]
